# Supplementary material for: MG132 Induces Progerin Clearance and Improves Disease Phenotypes in HGPS-like Patients’ Cells
Source: MDPI journal article supplement (doi:10.3390/cells11040610), 2022-02-10
Supplement: s1 [file s1]

Supplementary Materials:

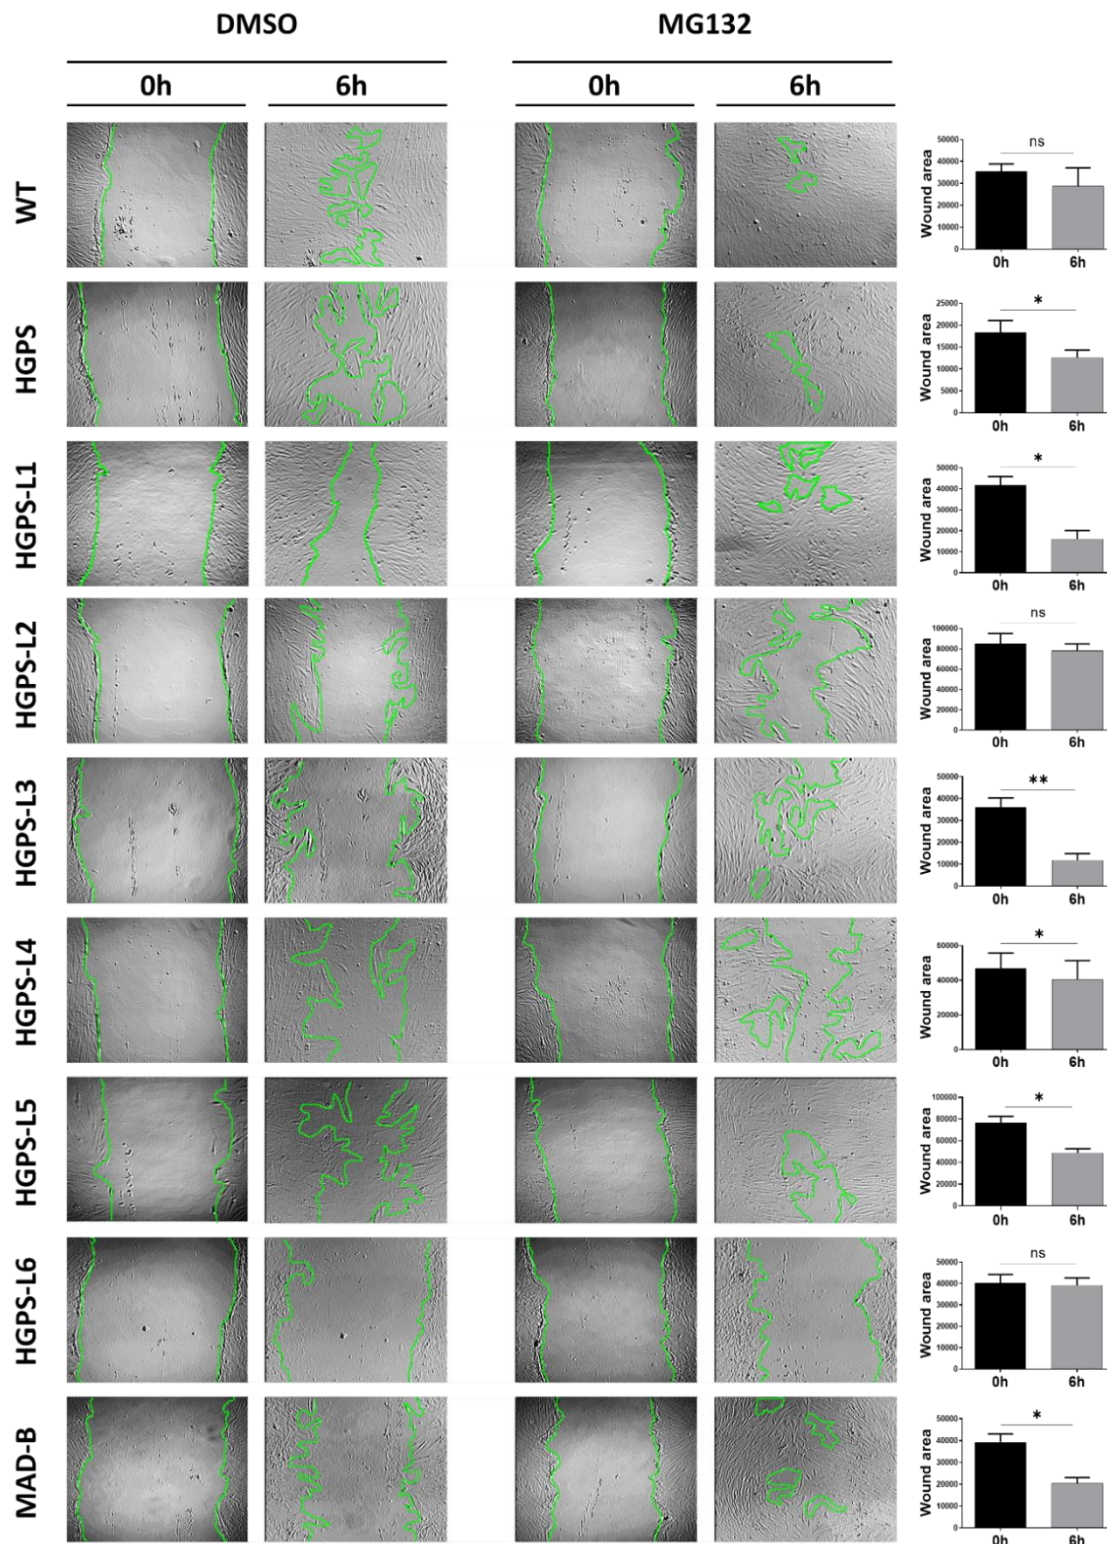

**Figure S1.** MG132 promotes HGPS-like and MAD-B fibroblasts migration. Wound healing assay performed on WT, HGPS, HGPS-like and MAD-B fibroblasts treated for 6h with DMSO or MG132 (500 nM). After subtracting the DMSO-induced wound repair during 6 h (control), results were expressed as the wound area following MG132 treatment (6 h) compared to the original wound (0 h). (mean  $\pm$  SEM,  $n = 3$ , Student's t-test, \*  $p < 0.05$ , \*\*  $p < 0.01$ ). Scale bar, 100  $\mu$ m.

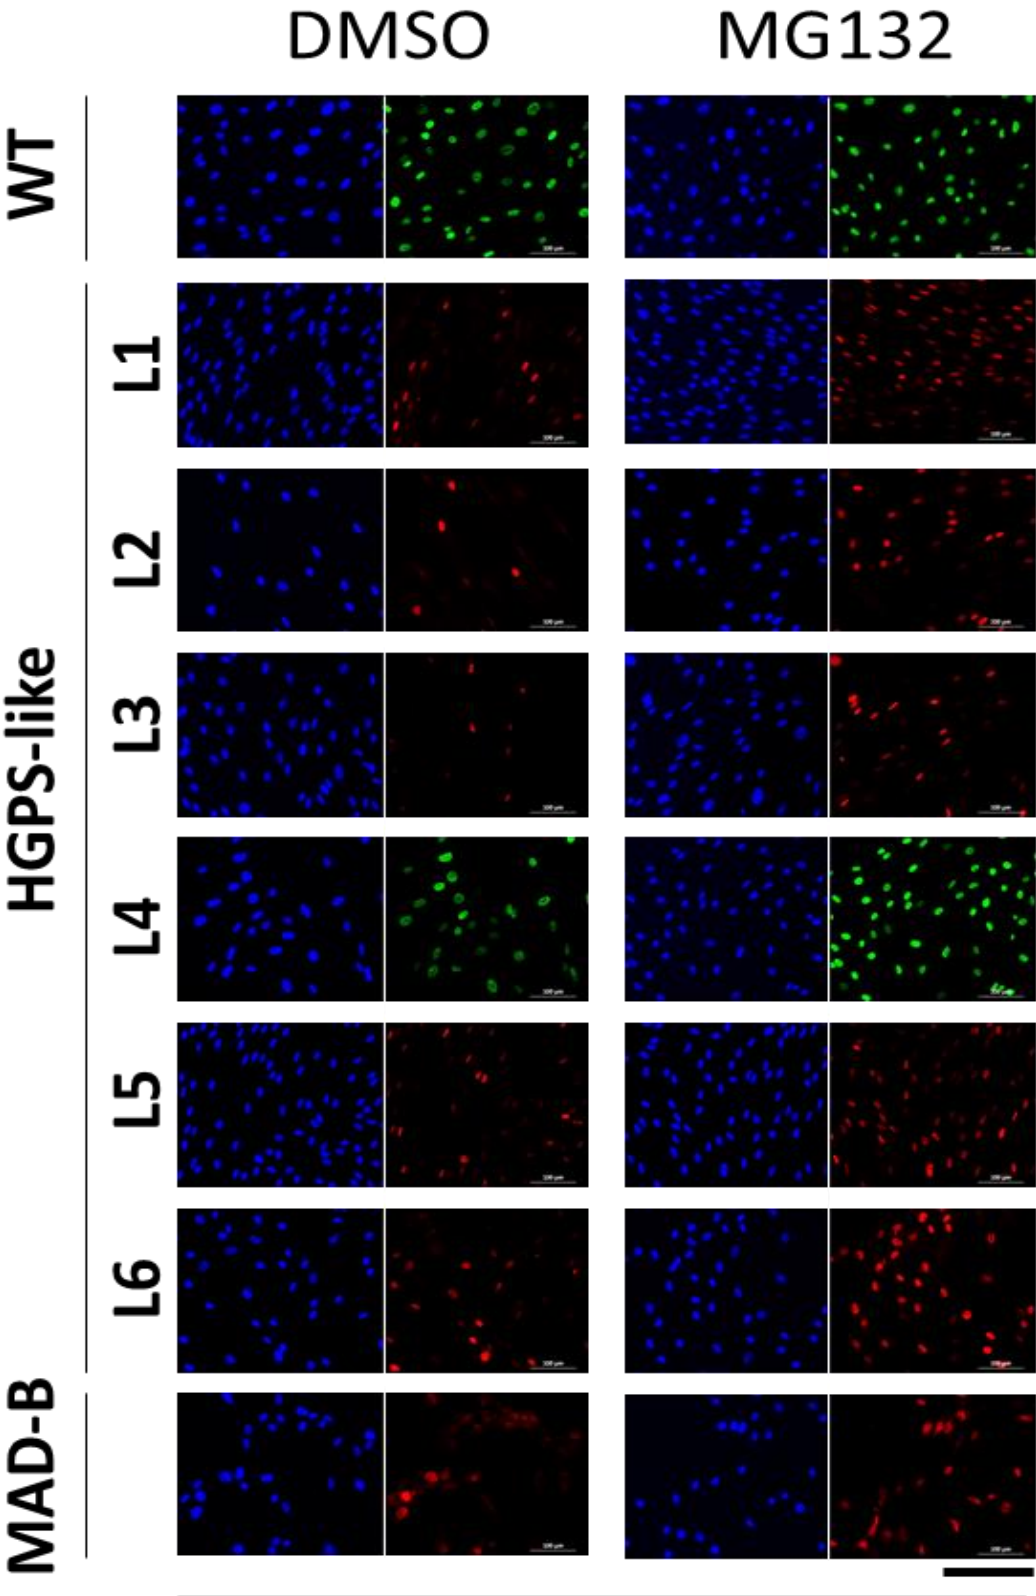

DAPI-H3-Tri-Me-K9

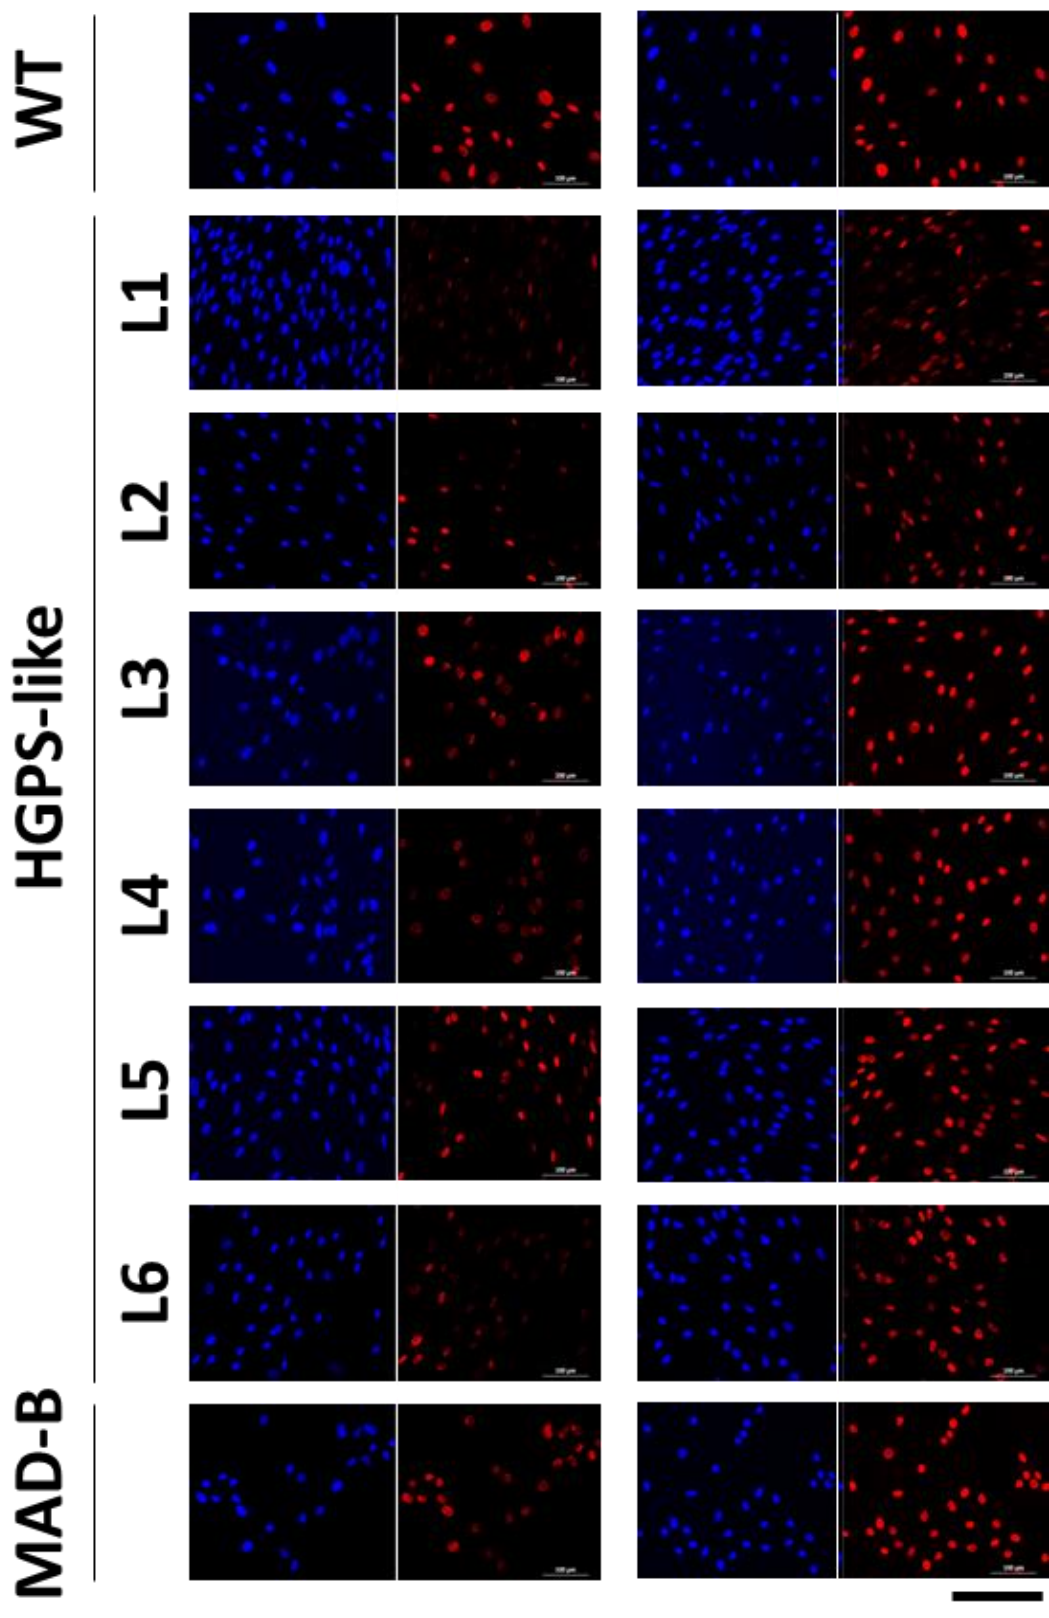

DAPI-Lamin B1



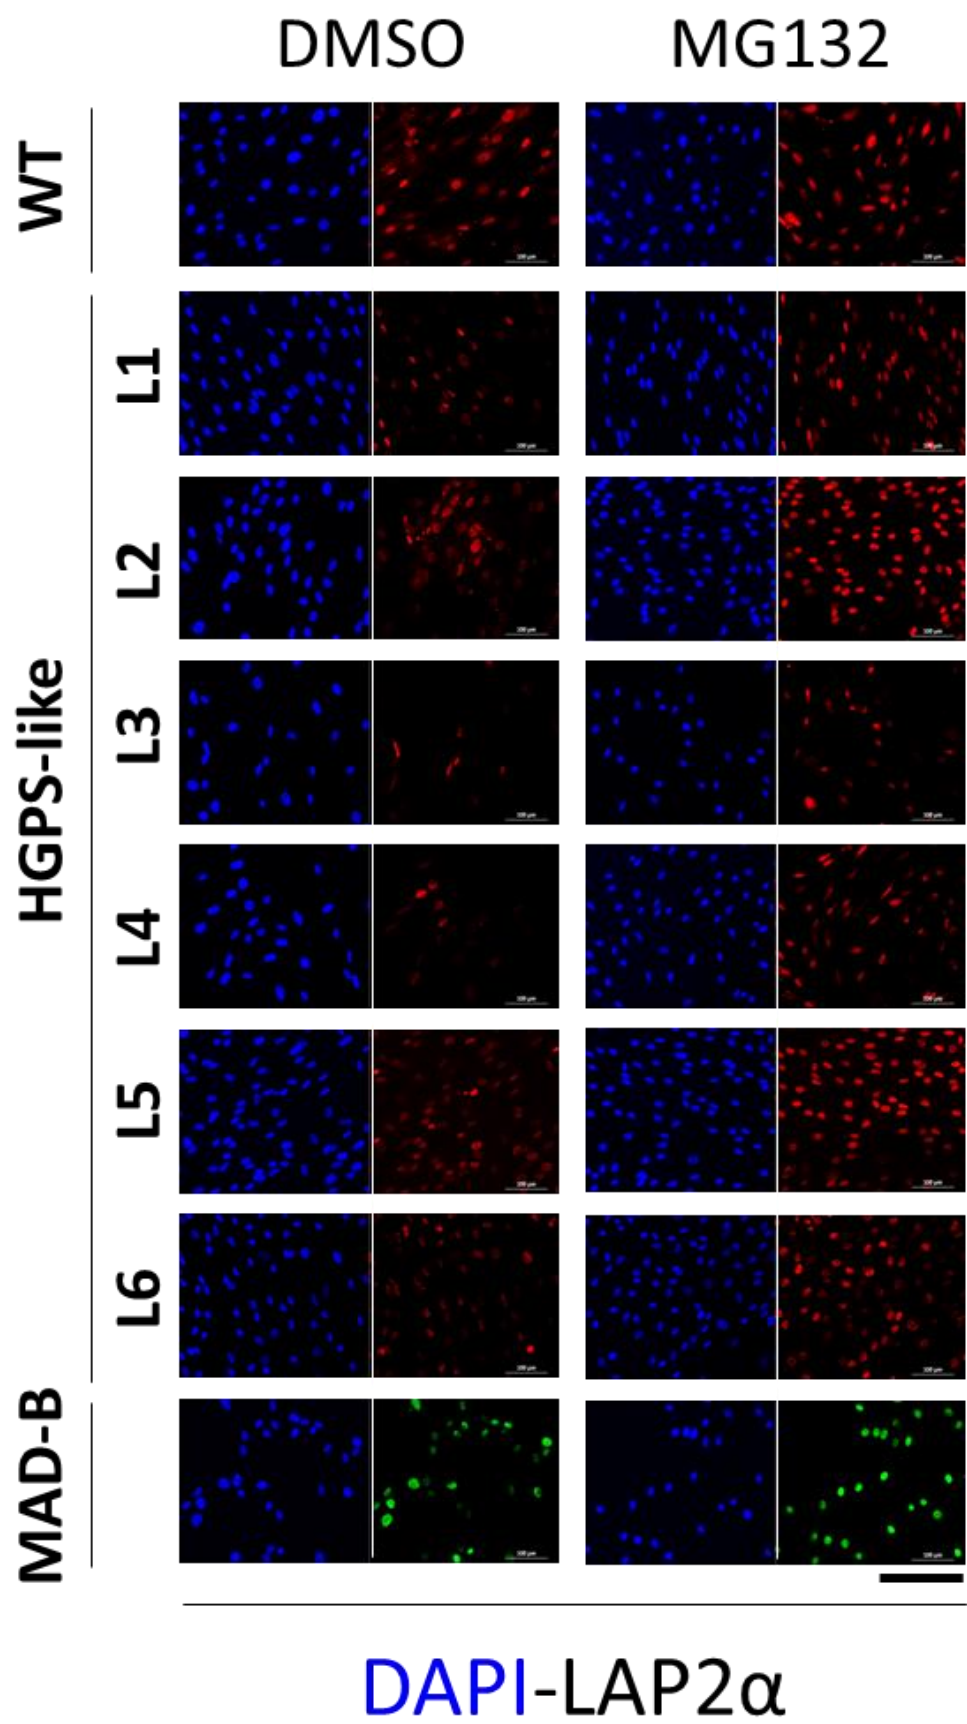

Figure S2. Larger images of Figure 4

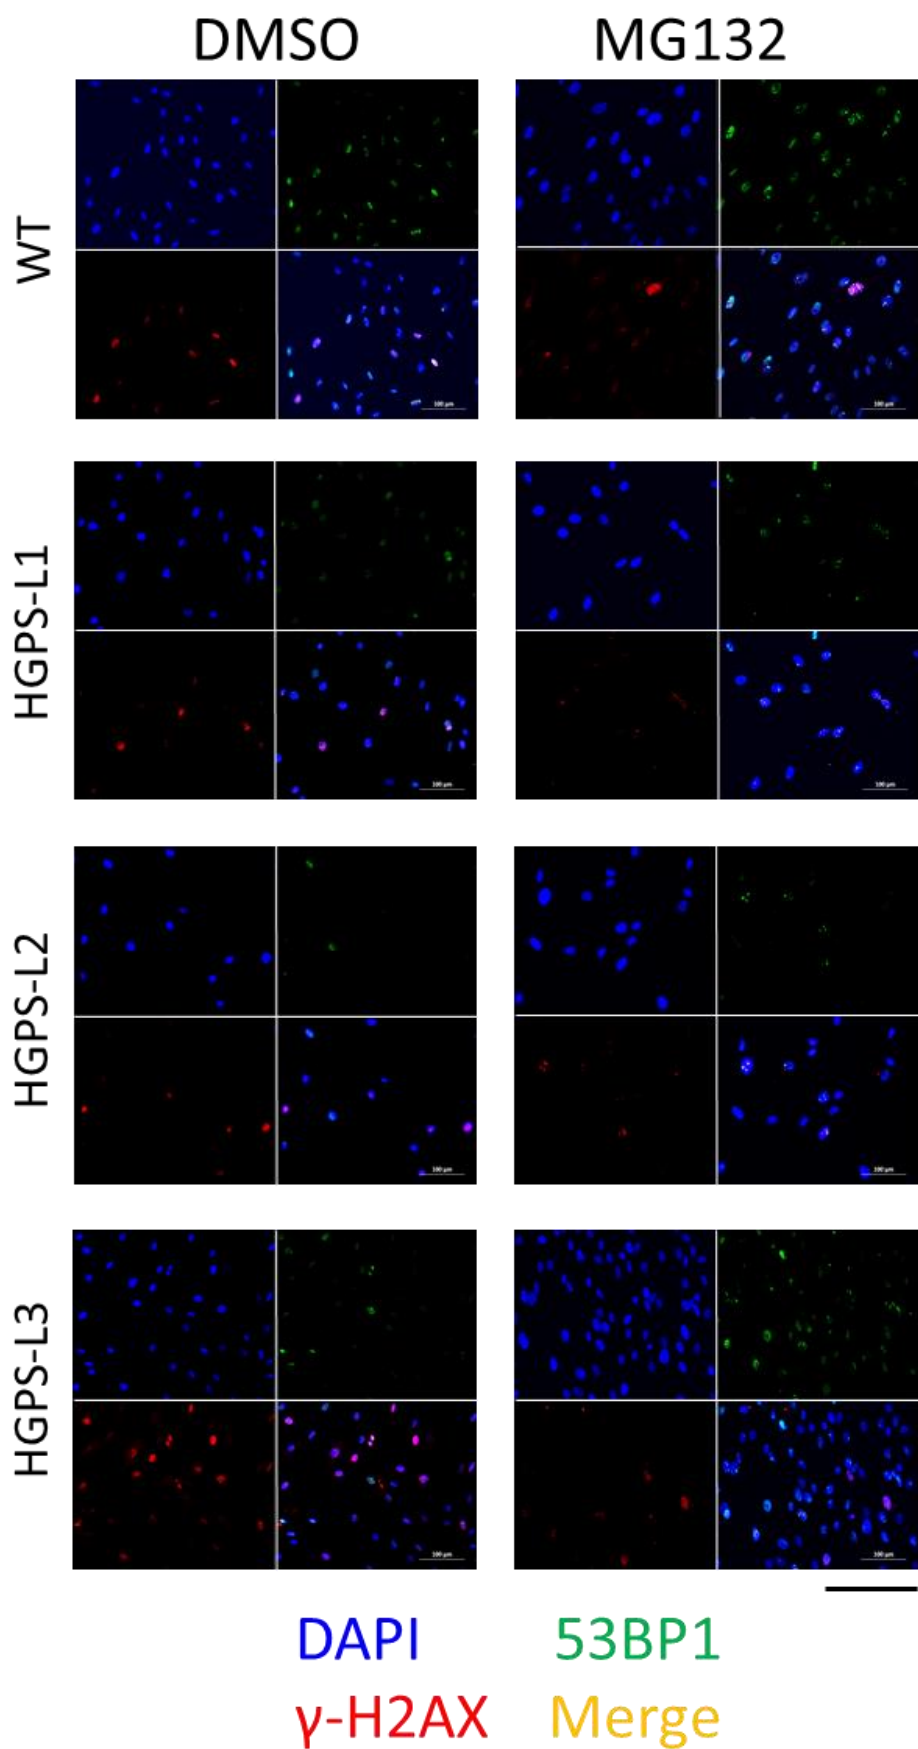

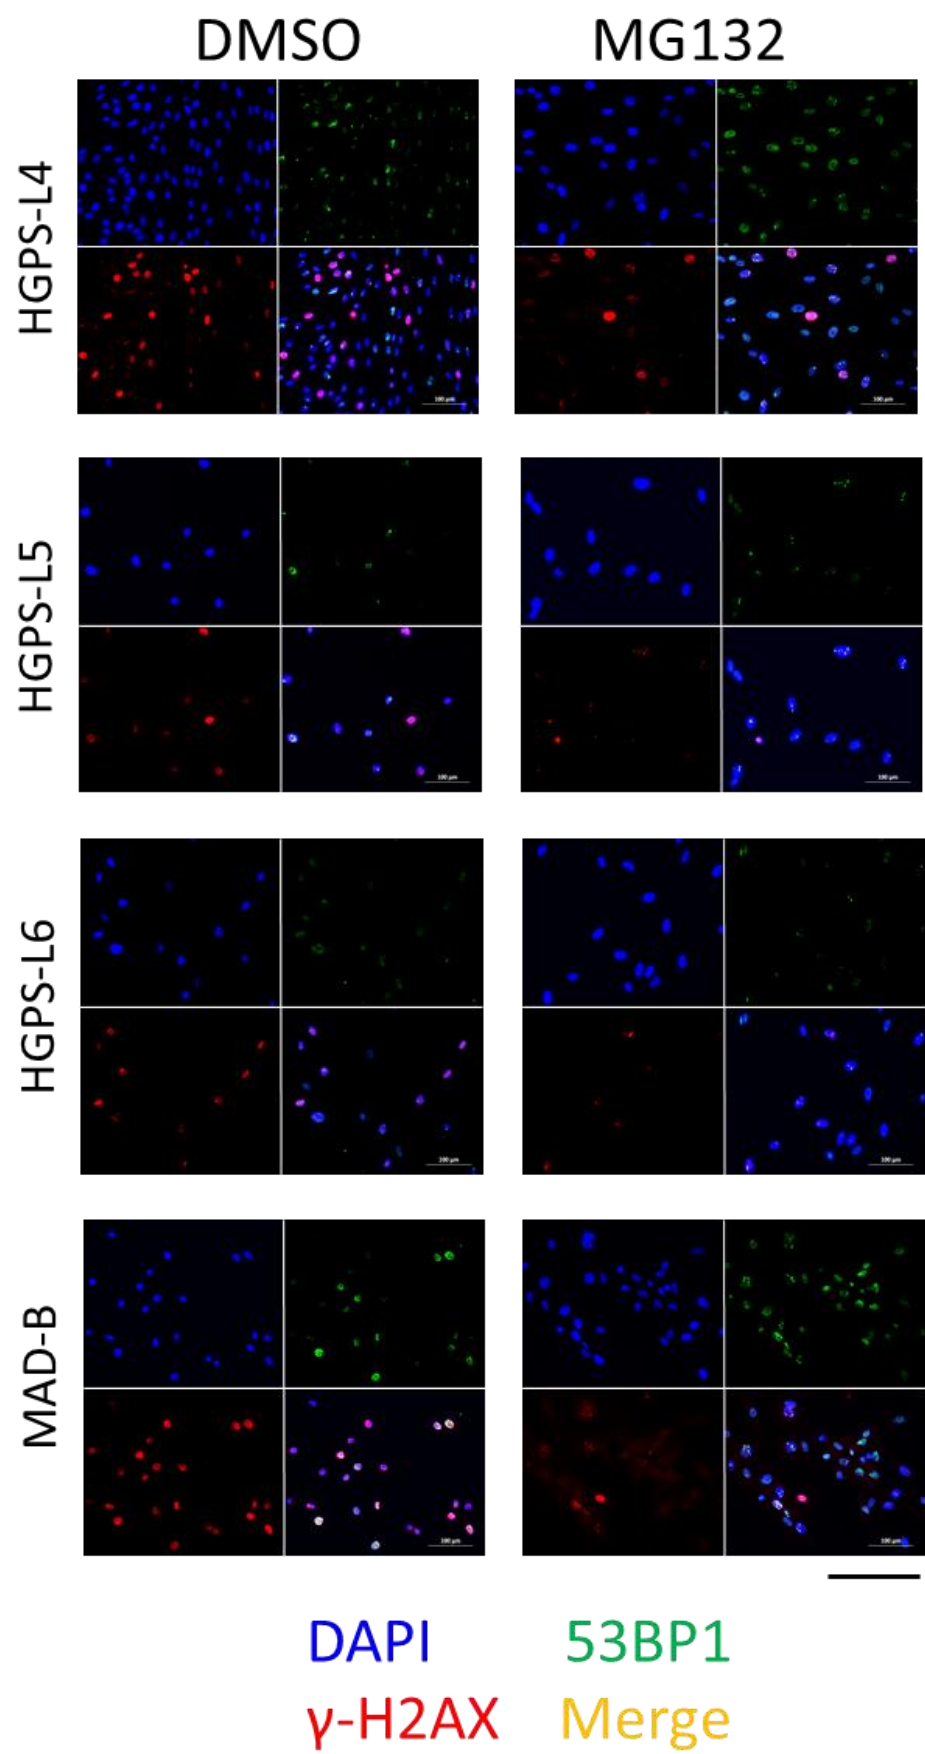

Figure S3. Larger images of Figure 5

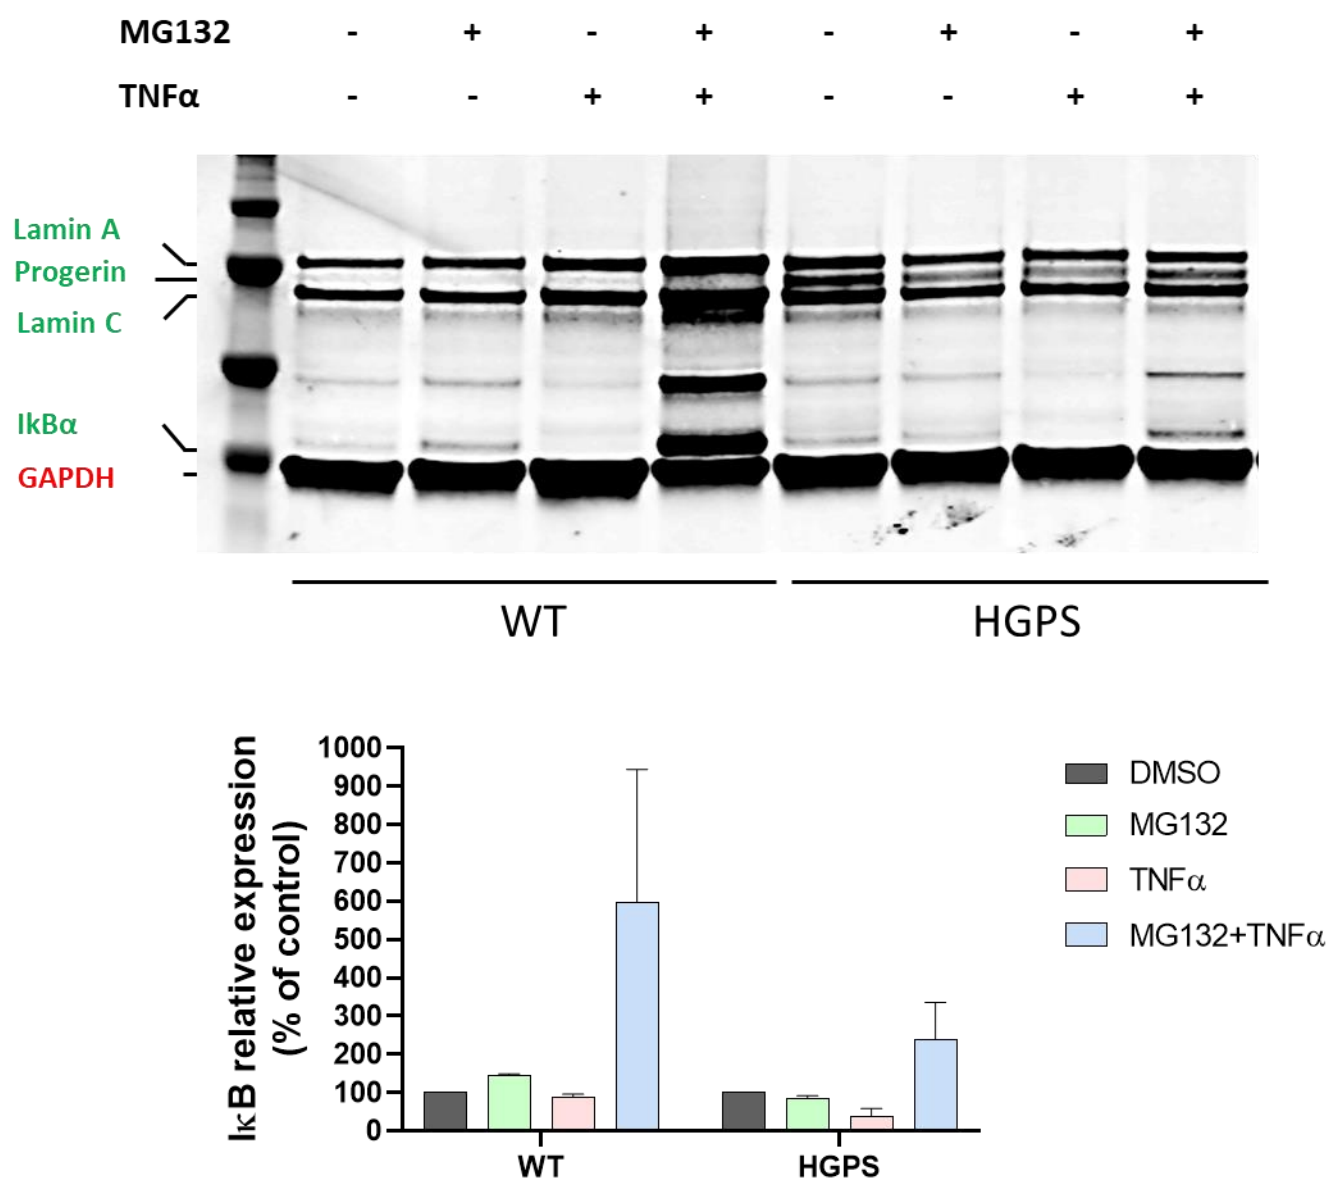

**Figure S4.** MG132 blocks the degradation of NF- $\kappa$ B inhibitor, I- $\kappa$ B. Upper panel: Western blotting evaluation of Lamin A/C and I- $\kappa$ B in whole cell lysates from WT and HGPS fibroblasts treated with DMSO (-), 500 nM MG132 for 48 h (+), 10 ng/ml TNF $\alpha$  for 48 h (+) alone or in combination. Lower panel: I- $\kappa$ B expression levels were normalized to GAPDH values using ImageJ software.

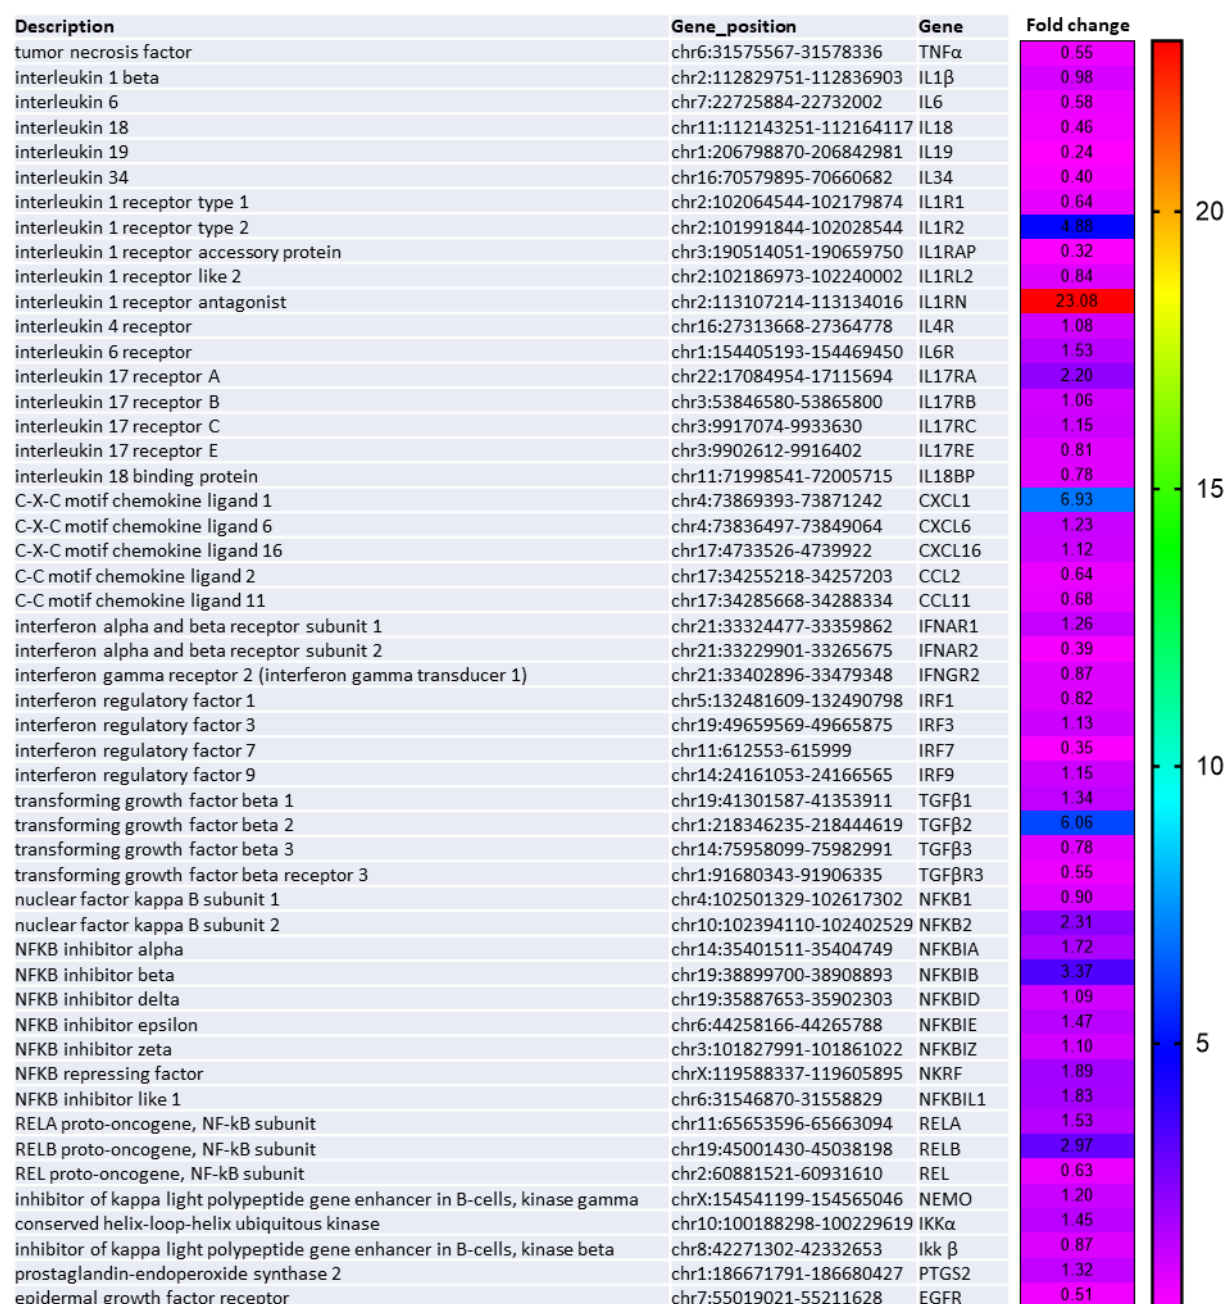

**Figure S5.** Transcriptional attenuation of inflammatory response to MG132 in classical HGPS fibroblasts. Heatmap of RNAseq data (ArrayExpress accession number: E-MTAB-5807) from HGPS fibroblasts treated with DMSO (vehicle control) or with 5  $\mu$ M MG132 for 6 h. This analysis represents the fold change, in MG132-treated relative to DMSO-treated HGPS fibroblasts, of the most characteristic transcripts of the NF- $\kappa$ B pathway. ( $n = 2$ ).



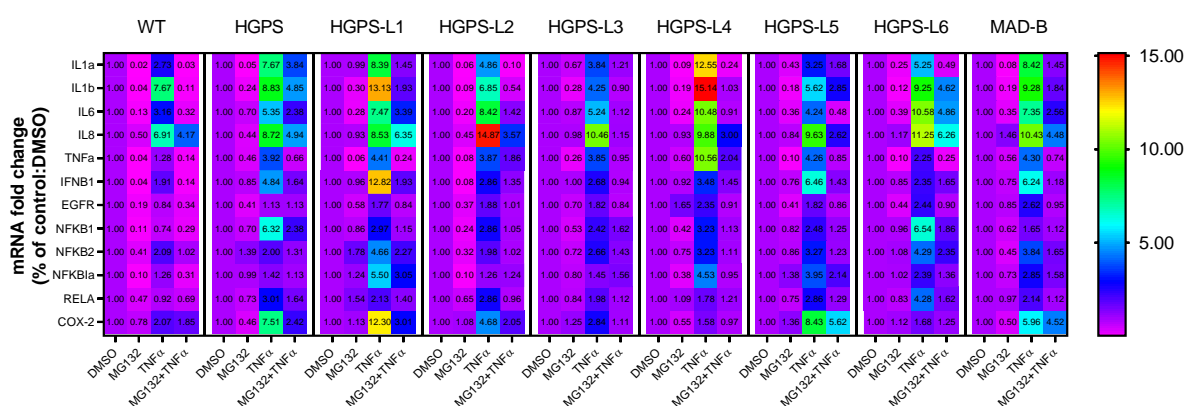

**Figure S6.** MG132 reduces the transcript levels of proinflammatory mediators and counteracts TNF $\alpha$ -induced inflammation. Quantitative real-time PCR using selected inflammatory genes expression arrays in culture supernatants of WT, HGPS, HGPS-like and MAD-B fibroblasts treated for 6 h with MG132 (500 nM), TNF $\alpha$  (10 ng/ml) alone and in combination or DMSO as a vehicle control.

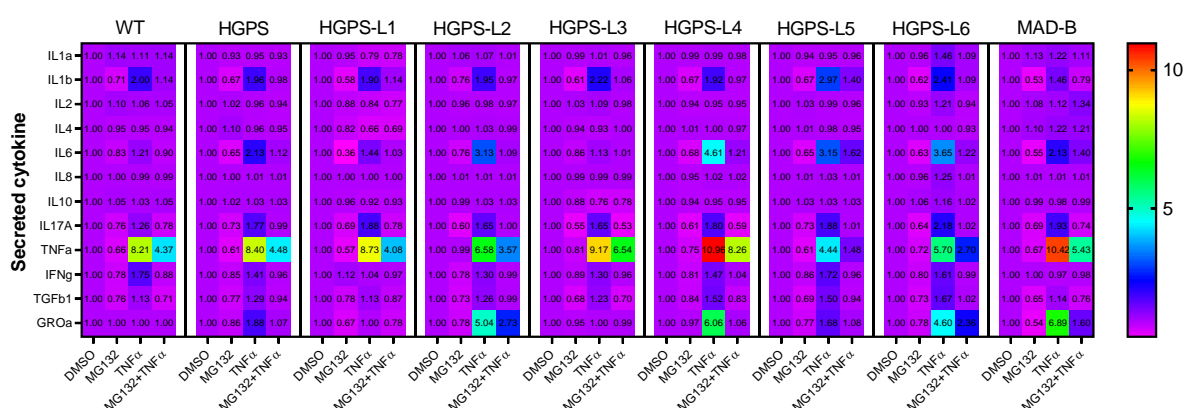

**Figure S7.** MG132 reduces the secretion of proinflammatory cytokines and alleviates TNF $\alpha$ -induced inflammation. Enzyme-Linked Immunosorbent Assay (ELISA) using multi-analyte ELISA arrays to measure inflammatory cytokines in culture supernatants of WT, HGPS, HGPS-like and MAD-B fibroblasts treated for 24 h with MG132 (500 nM), TNF $\alpha$  (10 ng/ml) alone and in combination or DMSO as a vehicle control.
